# Supplementary material for: Hydromorphological restoration stimulates river ecosystem metabolism
Source: Copernicus journal article supplement (doi:10.5194/bg-2016-431), 2016-10-31
Supplement: Supplementary file 1 [file bg-2016-431-supplement.zip]

Archive with 5 entries (5 files):
- Appendix A.pdf
- Appendix B.pdf
- Appendix C.pdf
- Appendix D.pdf
- Appendix E.xlsx
