# Supplementary material for: Hydromorphological restoration stimulates river ecosystem metabolism
Source: Copernicus journal article supplement (doi:10.5194/bg-2016-431), 2016-10-31

**Appendix S3: Diurnal patterns of ecosystem metabolism in the sampling stations at D, R1 and R2 for days on which GPP and ER were among the highest respectively lowest rates measured**

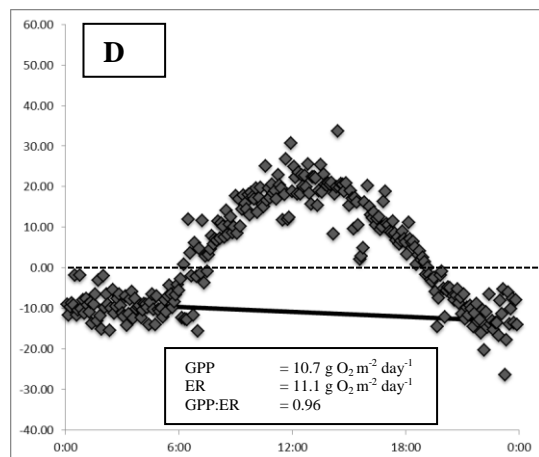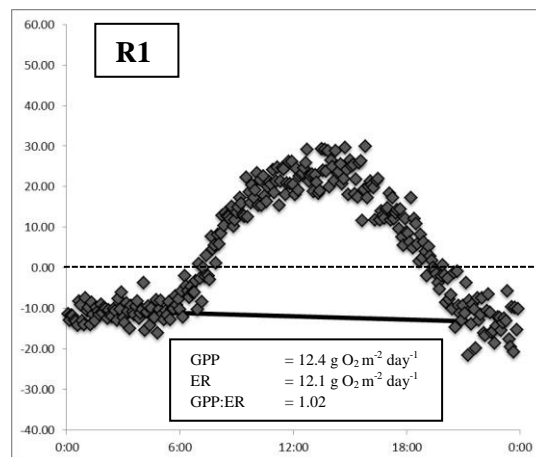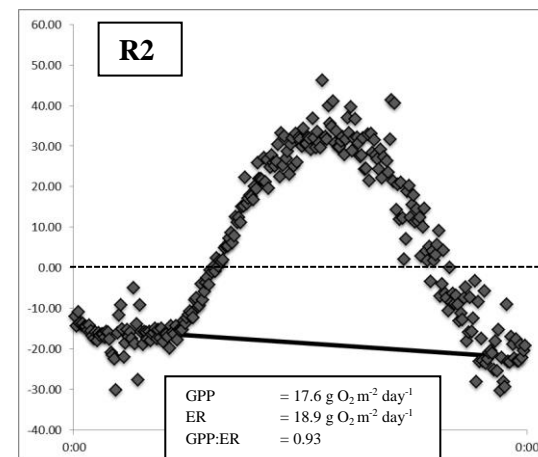

Day 17

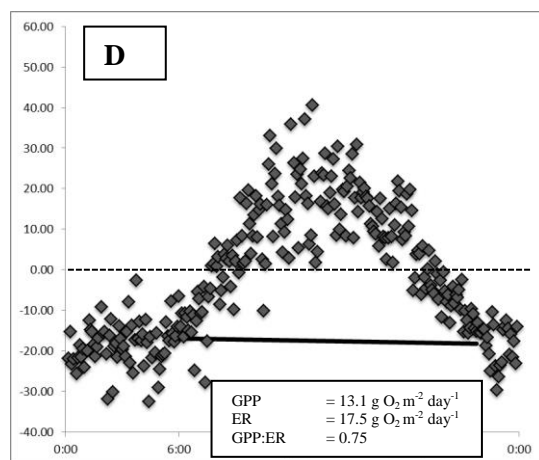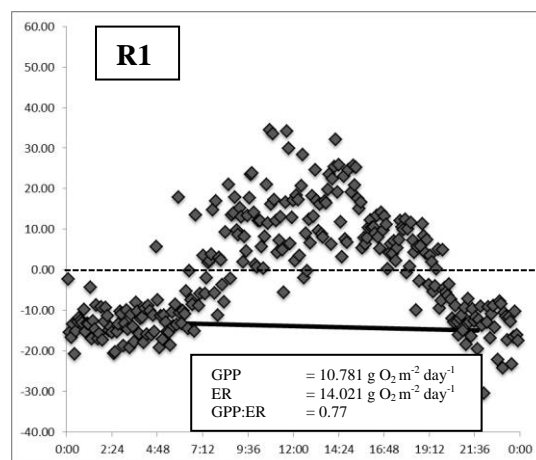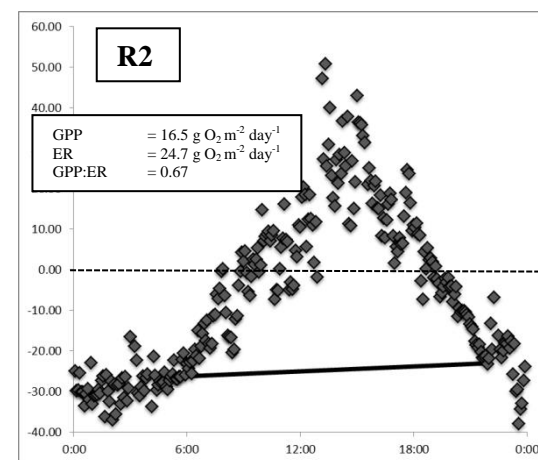

## Day 1

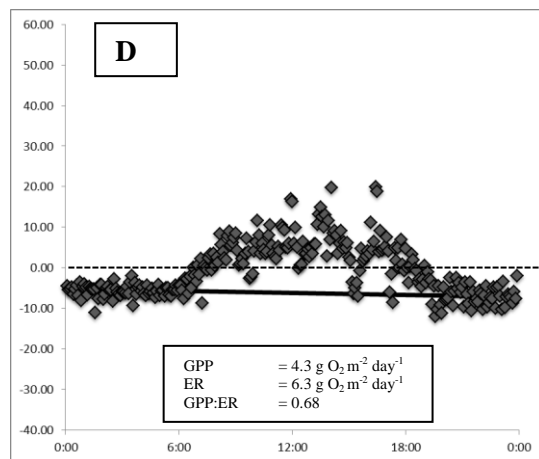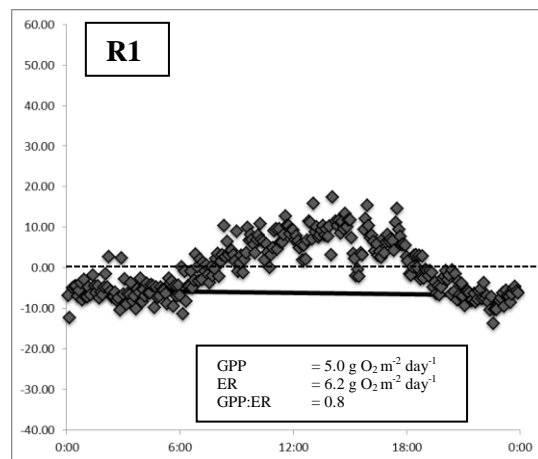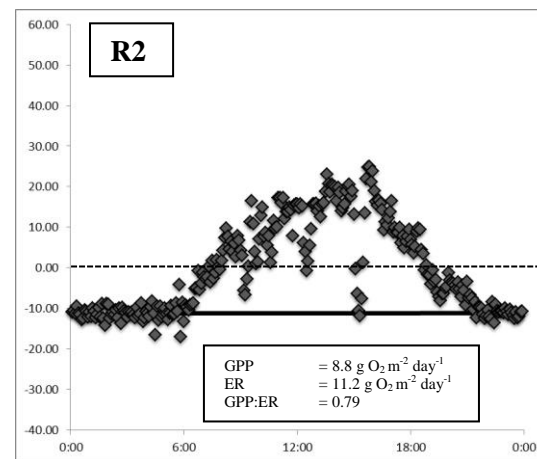

## Day 40

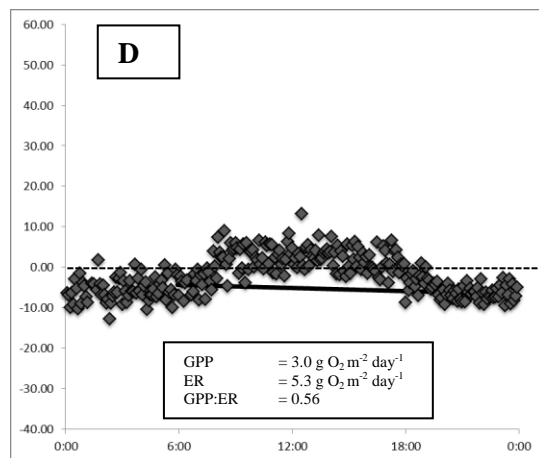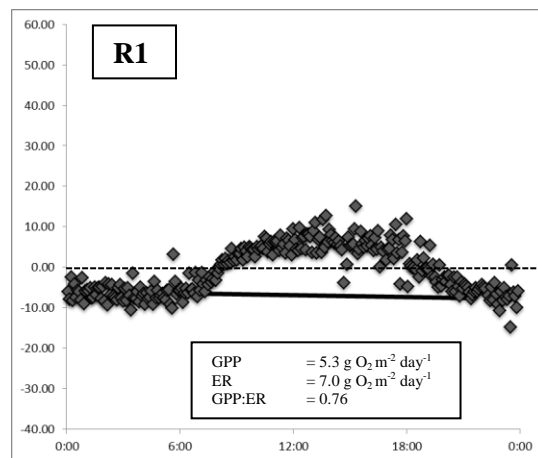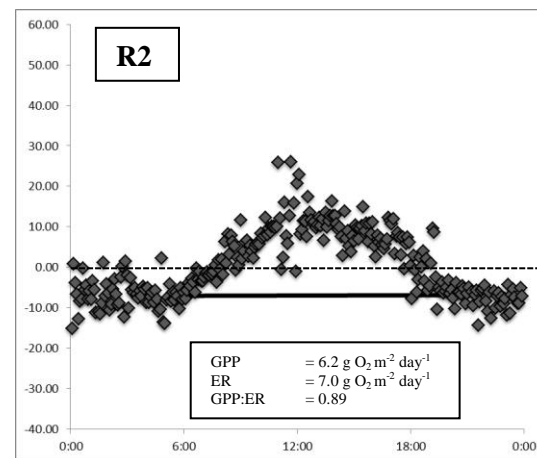

Supplement: Supplementary file 1 [file bg-2016-431-supplement.zip › Appendix C.pdf]
