# Supplementary material for: Hydromorphological restoration stimulates river ecosystem metabolism
Source: Copernicus journal article supplement (doi:10.5194/bg-2016-431), 2016-10-31
Supplement: Supplementary file 1 [file bg-2016-431-supplement.zip › Appendix E.xlsx]

## Sheet: comparison with literature data
Sampled river	River characteristics						Metabolism
Name, geographic region	Sediment structure	Hydromorphology/river state	Macrophytes	Additional information	Width (m)	Q (m3 s-1)	GPP (g O2 m-2 d-1)	ER (g O2 m-2 d-1)	GPP:ER	NEP (g O2 m-2 d-1)	Reference
Kissimmee River, Florida, USA	Sand	Channelised, restored habitat structure in river channel with continuous flow	Reduced cover of floating and mat forming vegetation	Sub-tropical, low-gradient, blackwater	15 – 30	36.595	3.95	-9.44	0.418432	-5.49	Colangelo, D.J. (2007) Response of river metabolism to restoration of flow in the Kissimmee River, Florida, U.S.A. Freshwater Biology, 52, 459–470.
Kansas River, Kansas, USA	Sand	Slightly braided, moderatley degraded (oxbow wetlands gone, bordered by cropland, no heavy industry or large urban area, some reservoirs)	No macrophytes, diatoms main primary producers	Prairie river, shallow	75	14.36	8.4	-12.12	0.693069	-3.72	Dodds, W.K., J.J. Beaulieu, J.J. Eichmiller, J.R. Fischer, N.R. Franssen, D.A. Gudder, A.S. Makinster, M.J. McCarthy, J.N. Murdock, J.M. O’Brien, J.L. Tank & R.W. Sheibley (2008) Nitrogen cycling and metabolism in the thalweg of a prairie river. Journal of Geophysical Research, 113, G04029.
Omo River, Fuji River Basin, Japan	Cobbles, boulders	Relativly good, degraded water quality due to agricultural land use	Less than 5% cover	Open-canopy lowland stream draining urban and agricultural land	N.a.	5.12	3.83	-9.13	0.419496	-5.3	Iwata, T., T. Takahashi, F. Kazama et al. (2007) Metabolic balance of streams draining urban and agricultural watersheds in central Japan. Limnology, 8, 243-250.
Aizarnazabal, Basque Country, Spain	Bedrock, cobble	Narrow and steep valleys with short and steep streams, biotic index: excellent	Occasionally, periphyton main primary producer	Humid-oceanic climate, formerly polluted	22.7	6.27	11	-17.2	0.639535	-6.2	Izagirre, O., U. Agirre, M. Bermejo, J. Pozo & A. Elosegi (2008) Environmental controls of whole-stream metabolism identified from continuous monitoring of Basque streams. Journal of the North American Benthological Society, 27, 252–268.
Alegia, Basque Country, Spain	Bedrock, cobble	Narrow and steep valleys with short and steep streams, biotic index: good	Occasionally, periphyton main primary producer	Humid-oceanic climate, formerly polluted	36.2	6.96	4.4	-12.5	0.352	-8.1	Izagirre, O., U. Agirre, M. Bermejo, J. Pozo & A. Elosegi (2008) Environmental controls of whole-stream metabolism identified from continuous monitoring of Basque streams. Journal of the North American Benthological Society, 27, 252–268.
Altzola, Basque Country, Spain	Bedrock, cobble	Narrow and steep valleys with short and steep streams, biotic index: poor	Occasionally, periphyton main primary producer	Humid-oceanic climate, formerly polluted	31.1	9.47	6.4	-42.6	0.150235	-36.2	Izagirre, O., U. Agirre, M. Bermejo, J. Pozo & A. Elosegi (2008) Environmental controls of whole-stream metabolism identified from continuous monitoring of Basque streams. Journal of the North American Benthological Society, 27, 252–268.
Amorebieta, Basque Country, Spain	Bedrock, cobble	Narrow and steep valleys with short and steep streams, biotic index: very poor	Occasionally, periphyton main primary producer	Humid-oceanic climate, formerly polluted	23.3	5.55	2.8	-9.8	0.285714	-7	Izagirre, O., U. Agirre, M. Bermejo, J. Pozo & A. Elosegi (2008) Environmental controls of whole-stream metabolism identified from continuous monitoring of Basque streams. Journal of the North American Benthological Society, 27, 252–268.
Lasarte, Basque Country, Spain	Bedrock, cobble	Narrow and steep valleys with short and steep streams, biotic index: fair	Occasionally, periphyton main primary producer	Humid-oceanic climate, formerly polluted	46.4	22.74	6.3	-13.5	0.466667	-7.2	Izagirre, O., U. Agirre, M. Bermejo, J. Pozo & A. Elosegi (2008) Environmental controls of whole-stream metabolism identified from continuous monitoring of Basque streams. Journal of the North American Benthological Society, 27, 252–268.
Little Tennessee River, North Carolina, USA	Sand becoming a mix of bedrock, large boulders, and sand	Broad alluvial valley becoming constrained valley	N.a.	N.a.	N.a.	12.9	3.18	-4.065	0.782288	-0.885	McTammany, M.E., J.R. Webster, E.F. Benfield & M.A. Neatrour (2003) Longitudinal patterns of metabolism in a southern Appalachian river. Journal of the North American Benthological Society, 22, 359–370.
Thur River, Switzerland	Gravel	Channelised with stabilised banks, with reach partly being opened (i.e. removal of bank fixation)	N.a.	Alpine river	35	48.7	5	-6.2	0.806452	-1.2	Uehlinger, U. 2006. Annual cycle and inter-annual variability of gross primary production and ecosystem respiration in a floodprone river during a 15-year period. Freshwater Biology, 51, 938–950.
Murrumbidgee River, Darlington Point, Australia	Clay, silt with sandy bars	Degraded, but not channelized	Very little macrophytes	In an agricultural area	N.a.	22	1.71	-1.9	0.9	-0.19	Vink, S., M. Bormans, P.W. Ford & N.J. Grigg (2005) Quantifying ecosystem metabolism in the middle reaches of Murrumbidgee River during irrigation flow releases. Marine and Freshwater Research, 56, 227–241.
Daly, Australia	Sand, gravel	Natural, about 5% of the land cleared of natural vegetation, no dams, essentially natural flow, intermittent river	Very little macrophytes	5th - 7th order, tropical, shallow, clear water, low nutrient concentration, open canopy	N.a.	24	2.9	-5.34	0.543071	-2.44	Townsend, S.A. & A.V. Padovan (2005) The seasonal accrual and loss of benthic algae (Spirogyra) in the Daly River, an oligotrophic river in tropical Australia. Marine and Freshwater Research, 56, 317–327.
Mitchell River (MCC, upper site), Australia	Sand, bedrock	Continuous run-pool channel morphology	No macrophytes	Dry season sampled, riparian vegetation present	32	27.2	2.12	-4.47	0.474273	-2.35	Hunt, R.J., T.D. Jardine, S.K. Hamilton & S.E. Bunn (2012) Temporal and spatial variation in ecosystem metabolism and food web carbon transfer in a wet-dry tropical river. Freshwater Biology, 57, 435-450.
Buffalo Fork, Wyoming, USA	Cobble, gravel/pebble	Natural	No macrophytes	N.a.	35.2	19.1	0.8	-3.4	0.235294	-2.6	Hall, R.O., J.L. Tank, M.A. Baker, E.J. Rosi-Marshall & E.R. Hotchkiss (2016) Metabolism, Gas Exchange, and Carbon Spiraling in Rivers. Ecosystems, 19, 73-86.
Green River, Wyoming, USA	Cobble, boulder	Natural	N.a.	Below a dam	62.5	25.5	19.9	-17.5	1.13714	2.4	Hall, R.O., J.L. Tank, M.A. Baker, E.J. Rosi-Marshall & E.R. Hotchkiss (2016) Metabolism, Gas Exchange, and Carbon Spiraling in Rivers. Ecosystems, 19, 73-86.
Salmon River, USA	Cobble, gravel	Natural	No macrophytes	N.a.	50.5	25.9	4	-5.1	0.784314	-1.1	Hall, R.O., J.L. Tank, M.A. Baker, E.J. Rosi-Marshall & E.R. Hotchkiss (2016) Metabolism, Gas Exchange, and Carbon Spiraling in Rivers. Ecosystems, 19, 73-86.
Tippecanoe River, Indiana, USA	Gravel, pebble with sand and fine sediment	Natural	No macrophytes	N.a.	50.6	19	2.6	-5.3	0.490566	-2.7	Hall, R.O., J.L. Tank, M.A. Baker, E.J. Rosi-Marshall & E.R. Hotchkiss (2016) Metabolism, Gas Exchange, and Carbon Spiraling in Rivers. Ecosystems, 19, 73-86.
Muskgeon River, Michigan, USA	Sand, silt, clay with gravel and cobbles	Natural	9% cover	N.a.	67	33	3	-4.8	0.625	-1.8	Hall, R.O., J.L. Tank, M.A. Baker, E.J. Rosi-Marshall & E.R. Hotchkiss (2016) Metabolism, Gas Exchange, and Carbon Spiraling in Rivers. Ecosystems, 19, 73-86.
Manistee River, Michigan, USA	Sand, silt, clay with gravel and pebble	Natural	13% cover	N.a.	52.5	36.5	3.9	-4.4	0.886364	-0.5	Hall, R.O., J.L. Tank, M.A. Baker, E.J. Rosi-Marshall & E.R. Hotchkiss (2016) Metabolism, Gas Exchange, and Carbon Spiraling in Rivers. Ecosystems, 19, 73-86.
Bear River, Utah, USA	Sand, silt, clay	Natural morphology but hydrologically altered	No macrophytes	N.a.	37.3	16	1.1	-1.1	1	0	Hall, R.O., J.L. Tank, M.A. Baker, E.J. Rosi-Marshall & E.R. Hotchkiss (2016) Metabolism, Gas Exchange, and Carbon Spiraling in Rivers. Ecosystems, 19, 73-86.
Green River at Ouray, Utah, USA	Sand, silt, clay	Natural	1% cover	N.a.	111.8	37.9	1.1	-1.2	0.916667	-0.1	Hall, R.O., J.L. Tank, M.A. Baker, E.J. Rosi-Marshall & E.R. Hotchkiss (2016) Metabolism, Gas Exchange, and Carbon Spiraling in Rivers. Ecosystems, 19, 73-86.
Green River at Gray Canyon, Utah, USA	Fine sediments with gravel and cobbles	Natural	< 1% cover	N.a.	79.1	41	0.3	-3	0.1	-2.7	Hall, R.O., J.L. Tank, M.A. Baker, E.J. Rosi-Marshall & E.R. Hotchkiss (2016) Metabolism, Gas Exchange, and Carbon Spiraling in Rivers. Ecosystems, 19, 73-86.
Chena1, Alaska, USA	N.a.	Natural flow regime, undeveloped	N.a.	Sub-arctic, clear-water river, upper catchment ~undeveloped, lower catchment with urban development	N.a.	42	3.25	-8.95	0.363128	-5.7	Benson, E.R., M.S. Wipfli, J.E. Clapcott & N.F. Hughes (2013) Relationships between ecosystem metabolism, benthic macroinvertebrate densities, and environmental variables in a sub-arctic Alaskan river. Hydrobiologia, 701, 189–207.
Chena2, Alaska, USA	N.a.	Natural flow regime, undeveloped	N.a.	Sub-arctic, clear-water river, upper catchment ~undeveloped, lower catchment with urban development	N.a.	44.5	2.25	-5.8	0.387931	-3.55	Benson, E.R., M.S. Wipfli, J.E. Clapcott & N.F. Hughes (2013) Relationships between ecosystem metabolism, benthic macroinvertebrate densities, and environmental variables in a sub-arctic Alaskan river. Hydrobiologia, 701, 189–207.
Chena3, Alaska, USA	N.a.	Natural flow regime, undeveloped	N.a.	Sub-arctic, clear-water river, upper catchment ~undeveloped, lower catchment with urban development	N.a.	47	1.85	-6.1	0.303279	-4.25	Benson, E.R., M.S. Wipfli, J.E. Clapcott & N.F. Hughes (2013) Relationships between ecosystem metabolism, benthic macroinvertebrate densities, and environmental variables in a sub-arctic Alaskan river. Hydrobiologia, 701, 189–207.
Chena4, Alaska, USA	N.a.	Natural flow regime, undeveloped	N.a.	Sub-arctic, clear-water river, upper catchment ~undeveloped, lower catchment with urban development	N.a.	47.5	1.95	-5.9	0.330508	-3.95	Benson, E.R., M.S. Wipfli, J.E. Clapcott & N.F. Hughes (2013) Relationships between ecosystem metabolism, benthic macroinvertebrate densities, and environmental variables in a sub-arctic Alaskan river. Hydrobiologia, 701, 189–207.
Ichetucknee, Florida, USA	N.a.	N.a.	N.a.	N.a.	N.a.	8.9	10	-8.5	1.17647	1.5	Heffernan, J.B. & M.J. Cohen (2010) Direct and indirect coupling of primary production and diel nitrate dynamics in a subtropical spring-fed river. Limnol. Oceanogr., 55, 677–688.
East Fork, Indiana, USA	N.a.	Natural	N.a.	N.a.	47.9	14	4.7	-5.6	0.839286	-0.9	Hall, R.O., J.L. Tank, M.A. Baker, E.J. Rosi-Marshall & E.R. Hotchkiss (2016) Metabolism, Gas Exchange, and Carbon Spiraling in Rivers. Ecosystems, 19, 73-86.
N.a. = not available
