# Supplementary figures and images for: Hydromorphological restoration stimulates river ecosystem metabolism
Source: Copernicus journal article supplement (doi:10.5194/bg-2016-431), 2016-10-31

## Appendix S2: $K_{oxy}^{20}$ - discharge relationships for stations in D, R1 and R2.

All regressions with  $P > 0.05$

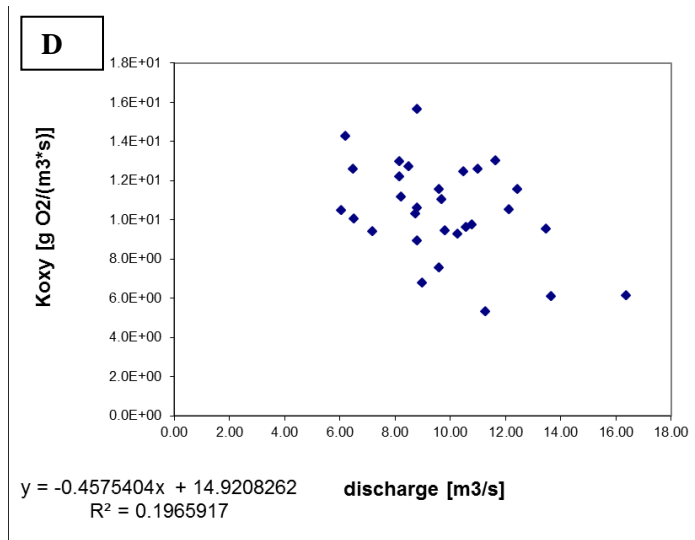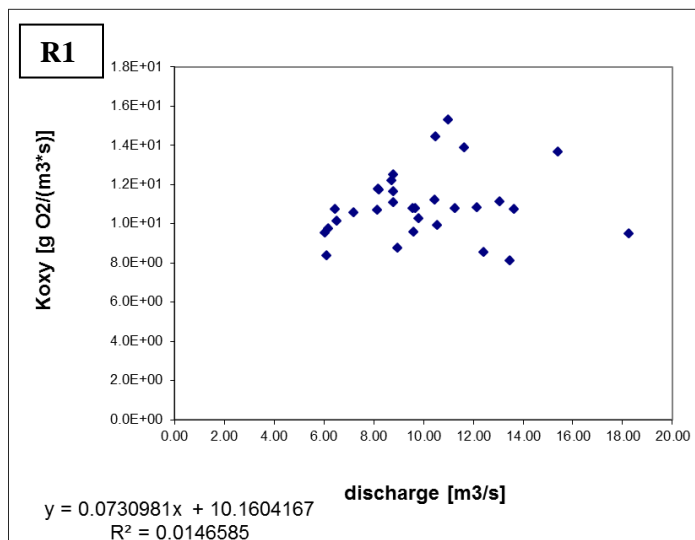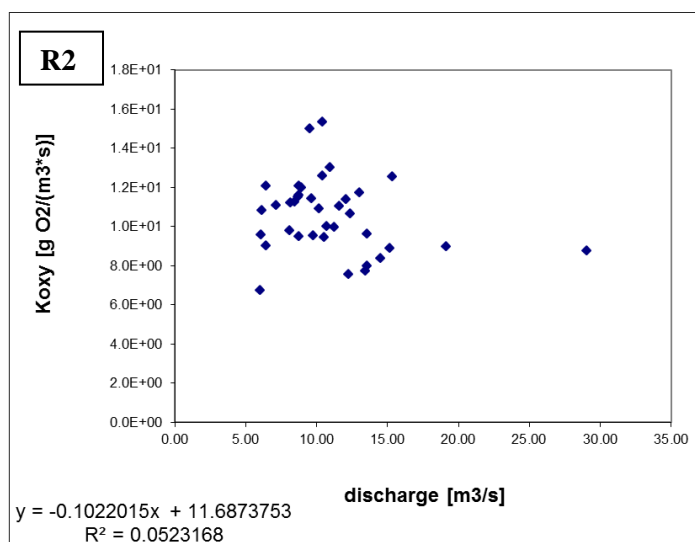

Supplement: Supplementary file 1 [file bg-2016-431-supplement.zip › Appendix B.pdf]
